# Supplementary material
Source: publisher figshare collection journal article supplement (https://springernature.figshare.com/ndownloader/files/17580194)
Supplement: Supplementary file 1 [file 17580194]

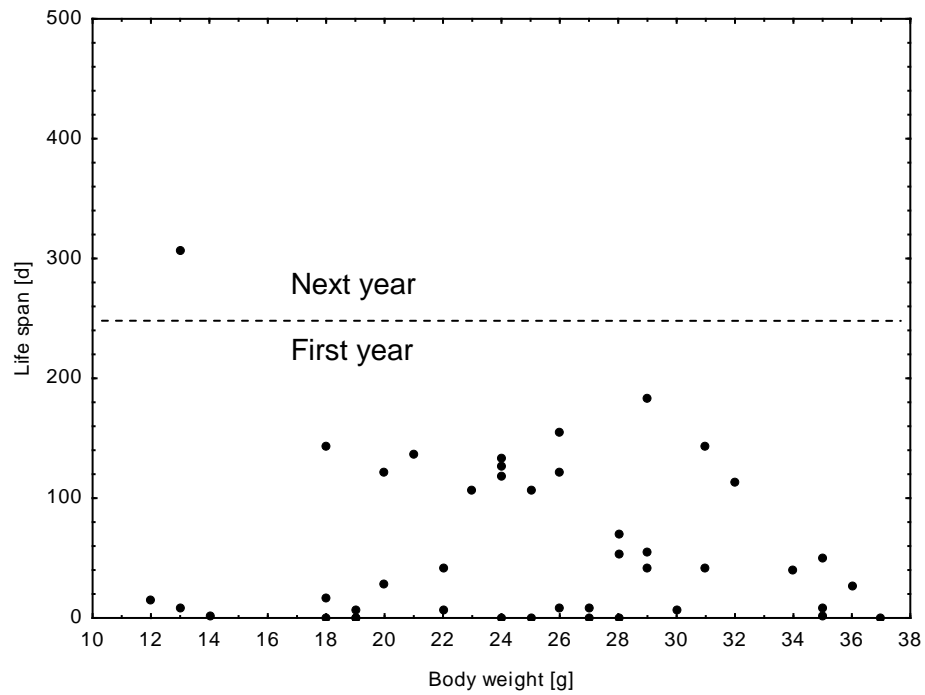

**Figure S1.** Life span vs. body weight of animals caught the first time in May. Only one individual survived until the next year.

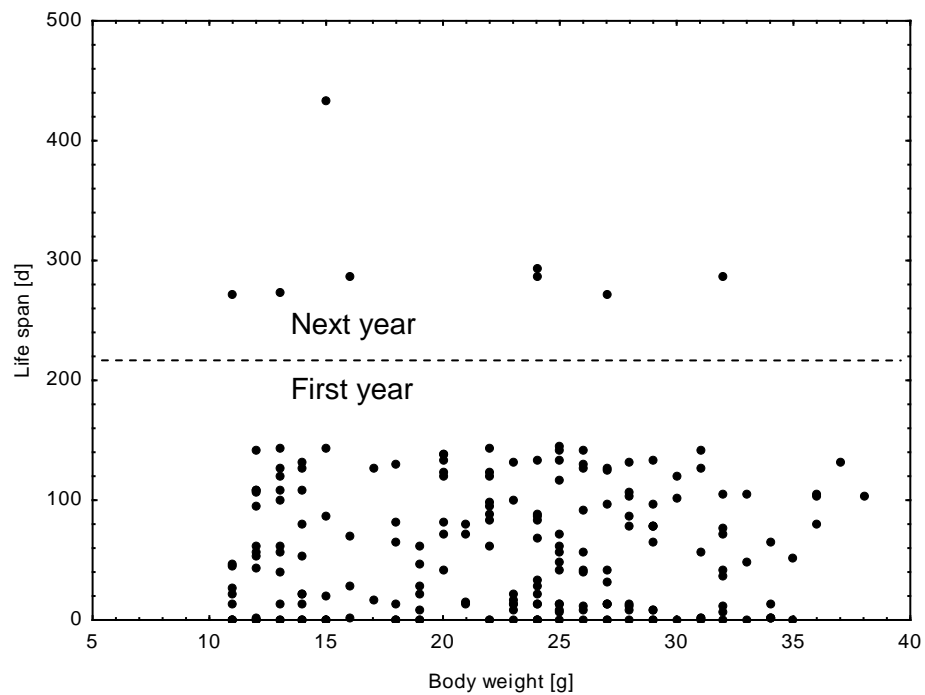

**Figure S2.** Life span vs. body weight of animals caught the first time in June.

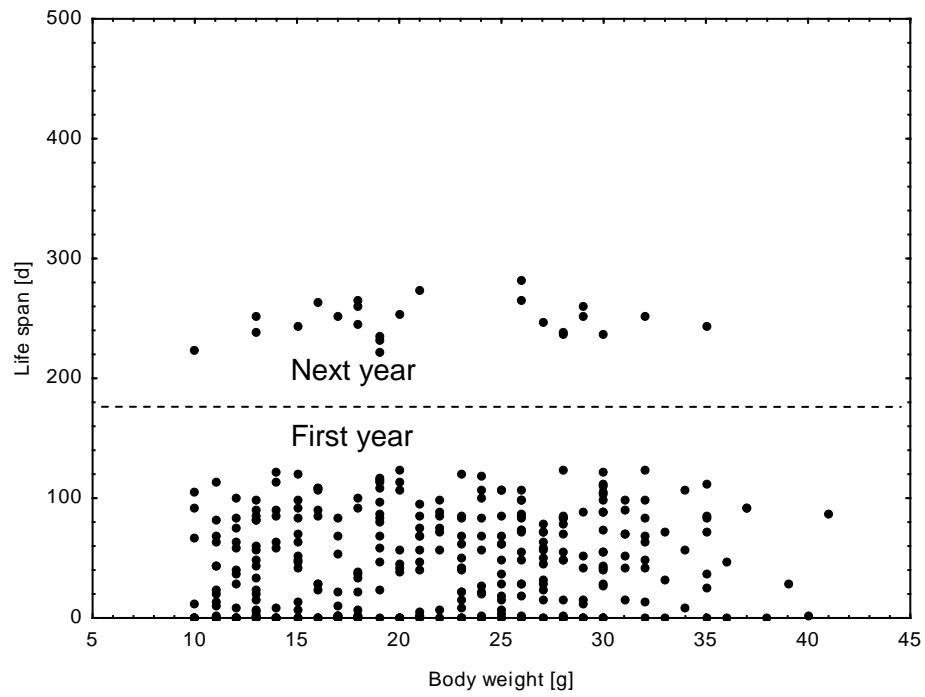

**Figure S3.** Life span vs. body weight of animals caught the first time in July.

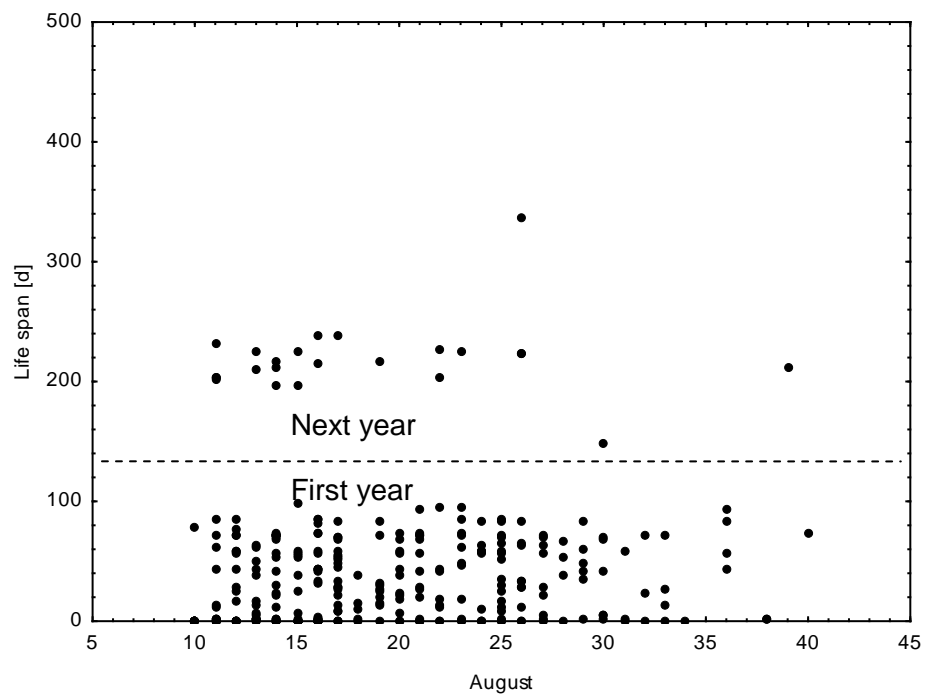

**Figure S4.** Life span vs. body weight of animals caught the first time in August.

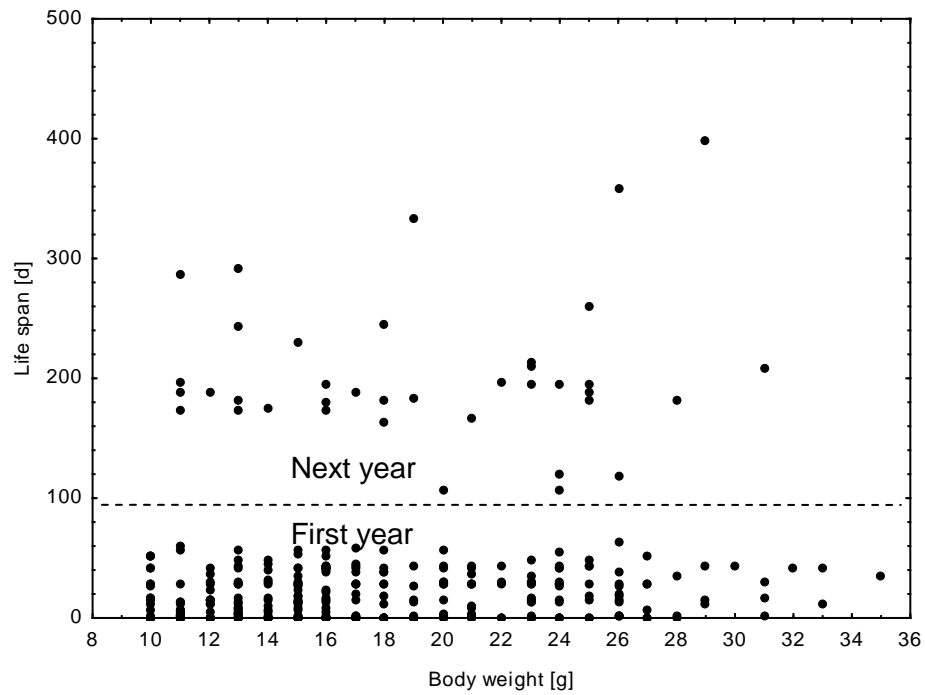

**Figure S4.** Life span vs. body weight of animals caught the first time in September.

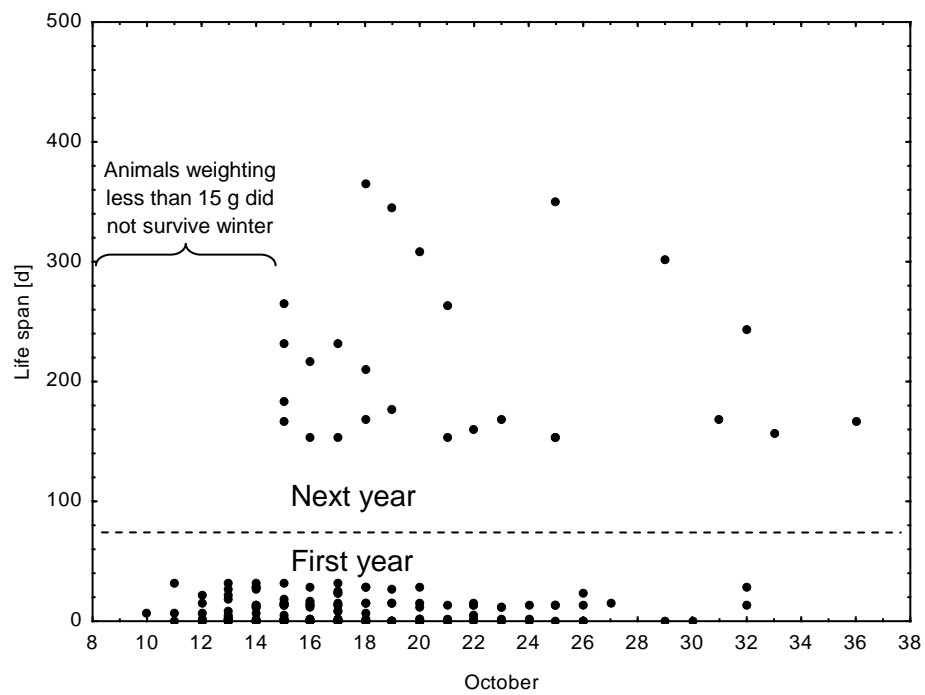

**Figure S5.** Life span vs. body weight of animals caught the first time in October.

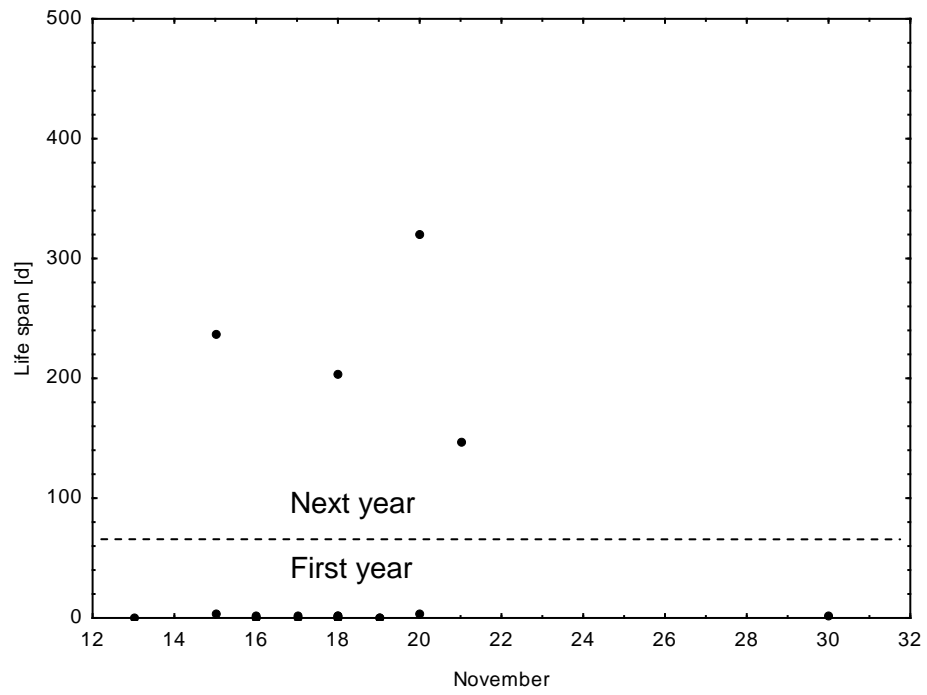

**Figure S6.** Life span vs. body weight of animals caught the first time in November.
